# Supplementary material for: Multi-Spectroscopic Analysis of Seed Quality and 13C-Stable-Iotopologue Monitoring in Initial Growth Metabolism of Jatropha curcas L
Source: PubMed Central journal article supplement (PMC4279157; doi:10.3390/metabo4041018), 2014-11-13
Supplement: metabolites-04-01018-s001.pdf [file metabolites-04-01018-s001.pdf]

## Supplementary Information

**Table S1.**  $^{13}\text{C}$  and  $^{15}\text{N}$  enrichments of various tissues of *Jatropha curcas*.  $^{13}\text{C}$  and  $^{15}\text{N}$  enrichments were means of three measurements of IR-MS.

|        | day | $\delta_{13\text{C}}/\%$ | (S.D.)  | $\delta_{15\text{N}}/\%$ | (S.D.)  |
|--------|-----|--------------------------|---------|--------------------------|---------|
| Leaves | 5   | 1.57                     | (0.009) | 3.75                     | (0.066) |
|        | 10  | 3.05                     | (0.024) | 10.60                    | (0.010) |
|        | 15  | 4.64                     | (0.008) | 13.26                    | (0.130) |
| Stems  | 5   | 3.10                     | (0.016) | 8.28                     | (0.027) |
|        | 10  | 6.67                     | (0.009) | 13.15                    | (0.055) |
|        | 15  | 7.52                     | (0.025) | 14.49                    | (0.060) |
| Roots  | 5   | 15.36                    | (0.124) | 19.12                    | (0.142) |
|        | 10  | 22.77                    | (0.578) | 33.10                    | (0.042) |
|        | 15  | 28.57                    | (0.355) | 41.45                    | (0.046) |

**Table S2.** List of chemical shifts assigned to water-soluble metabolites.

| Compounds | Position | $\delta_{1\text{H}}/\text{ppm}$ | $\delta_{13\text{C}}/\text{ppm}$ |
|-----------|----------|---------------------------------|----------------------------------|
| Glu       | $\alpha$ | 3.75                            | 56.9                             |
| Gln       | $\beta$  | 2.44                            | 33.6                             |
| Gln       | $\gamma$ | 2.13                            | 29.1                             |
| Arg       | $\alpha$ | 3.75                            | 56.9                             |
| Arg       | $\beta$  | 1.91                            | 30.4                             |
| Arg       | $\gamma$ | 1.64                            | 26.5                             |
| Arg       | $\gamma$ | 1.72                            | 26.5                             |
| Arg       | $\delta$ | 3.24                            | 43.3                             |
| Thr       | $\alpha$ | 3.58                            | 63.4                             |
| Thr       | $\beta$  | 4.24                            | 68.9                             |
| Thr       | $\gamma$ | 1.31                            | 22.3                             |
| Val       | $\alpha$ | 3.58                            | 63.4                             |
| Val       | $\beta$  | 2.27                            | 31.7                             |
| Val       | $\gamma$ | 0.99                            | 19.4                             |
| Val       | $\gamma$ | 1.03                            | 20.7                             |
| Ala       | $\alpha$ | 3.77                            | 53.4                             |
| Ala       | $\beta$  | 1.47                            | 18.8                             |
| Pro       | $\alpha$ | 4.11                            | 64.1                             |
| Pro       | $\beta$  | 2.05                            | 31.7                             |
| Pro       | $\beta$  | 2.33                            | 31.7                             |
| Pro       | $\gamma$ | 2.00                            | 26.5                             |
| Pro       | $\delta$ | 3.41                            | 48.8                             |
| Pro       | $\delta$ | 3.33                            | 48.8                             |
| Gly       | $\alpha$ | 3.55                            | 44.3                             |
| Ser       | $\alpha$ | 3.83                            | 59.2                             |
| Ser       | $\beta$  | 3.96                            | 63.1                             |
| Asn       | $\alpha$ | 3.99                            | 54.0                             |
| Asn       | $\beta$  | 2.86                            | 37.2                             |
| Asn       | $\beta$  | 2.94                            | 37.2                             |
| Asp       | $\alpha$ | 3.88                            | 55.0                             |

Table S2. Cont.

| Compounds    | Position   | $\delta_{1H}/\text{ppm}$ | $\delta_{13C}/\text{ppm}$ |
|--------------|------------|--------------------------|---------------------------|
| Asp          | $\beta$    | 2.66                     | 39.1                      |
| Asp          | $\beta$    | 2.78                     | 39.1                      |
| Glu          | $\alpha$   | 3.75                     | 56.9                      |
| Glu          | $\beta$    | 2.05                     | 29.8                      |
| Glu          | $\beta$    | 2.11                     | 29.8                      |
| Glu          | $\gamma$   | 2.34                     | 36.2                      |
| Lys          | $\alpha$   | 3.75                     | 56.9                      |
| Lys          | $\beta$    | 1.90                     | 32.4                      |
| Lys          | $\gamma$   | 1.44                     | 24.4                      |
| Lys          | $\gamma$   | 1.50                     | 24.4                      |
| Lys          | $\delta$   | 1.71                     | 28.9                      |
| Lys          | $\zeta$    | 3.03                     | 41.6                      |
| Leu          | $\alpha$   | 3.75                     | 56.9                      |
| Leu          | $\beta$    | 1.69                     | 42.4                      |
| Leu          | $\gamma$   | 1.72                     | 26.5                      |
| Leu          | $\delta$   | 0.94                     | 23.6                      |
| Leu          | $\delta$   | 0.95                     | 24.9                      |
| GABA         | 2          | 2.28                     | 37.2                      |
| GABA         | 3          | 1.91                     | 26.5                      |
| GABA         | 4          | 3.00                     | 42.0                      |
| Choline      | 1          | 4.05                     | 58.2                      |
| Choline      | 2          | 3.50                     | 70.2                      |
| Choline      | Me         | 3.19                     | 56.6                      |
| Ethanolamine | 1          | 3.82                     | 60.8                      |
| Ethanolamine | 2          | 3.13                     | 44.0                      |
| Malate       | 2          | 4.29                     | 73.1                      |
| Malate       | 3          | 2.36                     | 45.3                      |
| Malate       | 3          | 2.66                     | 45.3                      |
| Succinate    | 2          | 2.39                     | 36.9                      |
| Lactate      | 2          | 4.10                     | 71.5                      |
| Lactate      | 3          | 1.31                     | 22.3                      |
| Acetate      | 2          | 1.90                     | 25.6                      |
| Sucrose      | G1         | 5.40                     | 94.8                      |
| Sucrose      | G2         | 3.55                     | 73.8                      |
| Sucrose      | G3         | 3.75                     | 75.4                      |
| Sucrose      | G4         | 3.46                     | 72.1                      |
| Sucrose      | G5         | 3.83                     | 75.1                      |
| Sucrose      | G6         | 3.80                     | 62.8                      |
| Sucrose      | F1         | 3.66                     | 64.1                      |
| Sucrose      | F3         | 4.21                     | 79.3                      |
| Sucrose      | F4         | 4.04                     | 76.7                      |
| Sucrose      | F5         | 3.88                     | 84.1                      |
| Sucrose      | F6         | 3.80                     | 65.0                      |
| Glucose      | $\alpha 1$ | 5.23                     | 94.8                      |

Table S2. Cont.

| Compounds    | Position   | $\delta_{1H}/\text{ppm}$ | $\delta_{13C}/\text{ppm}$ |
|--------------|------------|--------------------------|---------------------------|
| Glucose      | $\alpha 2$ | 3.54                     | 74.1                      |
| Glucose      | $\alpha 3$ | 3.70                     | 75.4                      |
| Glucose      | $\alpha 4$ | 3.40                     | 72.5                      |
| Glucose      | $\alpha 5$ | 3.82                     | 74.1                      |
| Glucose      | $\beta 1$  | 4.63                     | 98.7                      |
| Glucose      | $\beta 2$  | 3.24                     | 77.0                      |
| Glucose      | $\beta 3$  | 3.46                     | 78.6                      |
| Glucose      | $\beta 4$  | 3.40                     | 72.5                      |
| Glucose      | $\beta 5$  | 3.46                     | 78.6                      |
| Glucose      | $\beta 6$  | 3.72                     | 63.4                      |
| Glucose      | $\beta 6$  | 3.88                     | 63.4                      |
| Fructose     | $\alpha 1$ | 3.55                     | 66.6                      |
| Fructose     | $\alpha 2$ | 3.70                     | 66.6                      |
| Fructose     | $\alpha 3$ | 4.10                     | 78.3                      |
| Fructose     | $\alpha 4$ | 4.10                     | 77.1                      |
| Fructose     | $\alpha 5$ | 3.81                     | 83.9                      |
| Fructose     | $\alpha 6$ | 3.69                     | 66.1                      |
| Fructose     | $\alpha 6$ | 4.01                     | 66.1                      |
| Fructose     | $\beta 1$  | 3.55                     | 65.3                      |
| Fructose     | $\beta 1$  | 3.65                     | 65.3                      |
| Fructose     | $\beta 3$  | 3.79                     | 70.2                      |
| Fructose     | $\beta 4$  | 3.88                     | 72.5                      |
| Fructose     | $\beta 5$  | 3.99                     | 71.8                      |
| Fructose     | $\beta 6$  | 3.66                     | 65.1                      |
| Fructose     | $\beta 6$  | 3.81                     | 65.1                      |
| Myo-inositol | 1          | 3.54                     | 74.1                      |
| Myo-inositol | 2          | 4.05                     | 75.1                      |
| Myo-inositol | 3          | 3.54                     | 74.1                      |
| Myo-inositol | 4          | 3.61                     | 75.1                      |
| Myo-inositol | 5          | 3.24                     | 77.0                      |
| Myo-inositol | 6          | 3.61                     | 75.1                      |

**Figure S1.** PCA score plots and loading plots of NIR analyses. (a), (b) 3D score plots of NIR analyses. 2D score plots of NIR analyses. (c), (d) PC1-PC2, and (e), (f) PC1-PC3. Coloring of score plots were based on varieties ((a), (c) and (e)) and germination rate ((b), (d) and (f)). Loading plots of PC1, PC2, and PC3.

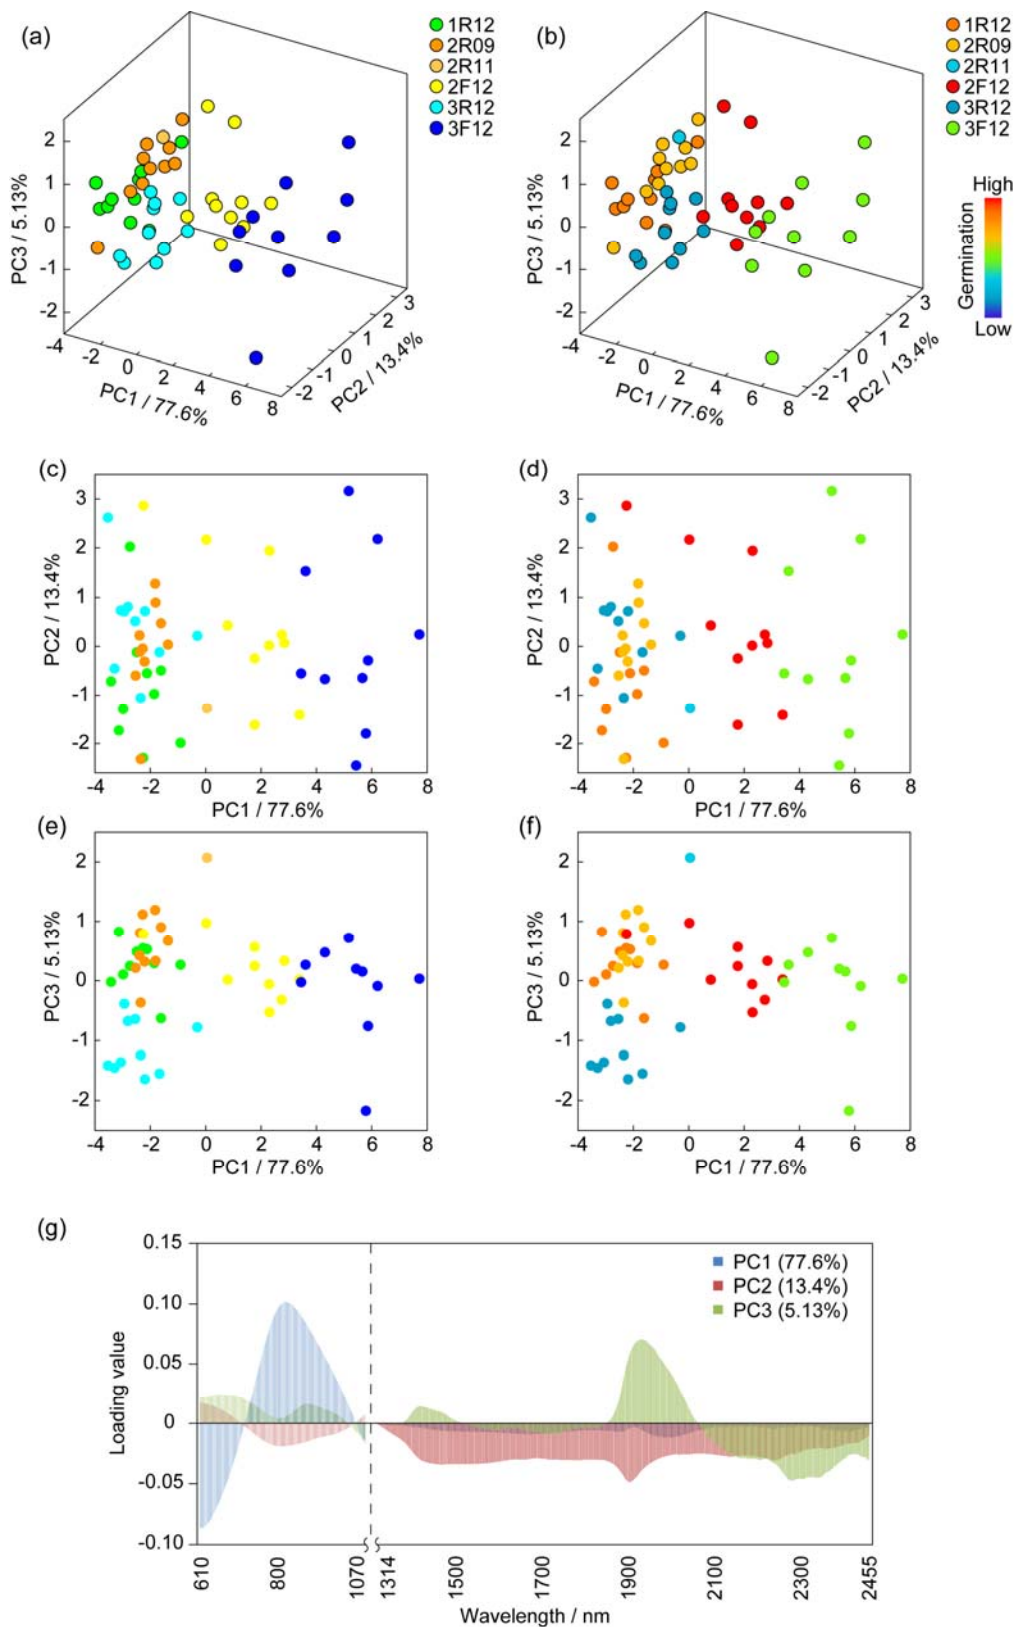

**Figure S2.** PCA score plots (PC1-PC3) of NIR analysis (a) before and (b) after removing outlier. An ellipse in score plot was represented the Hotelling's T2 95% confidence.

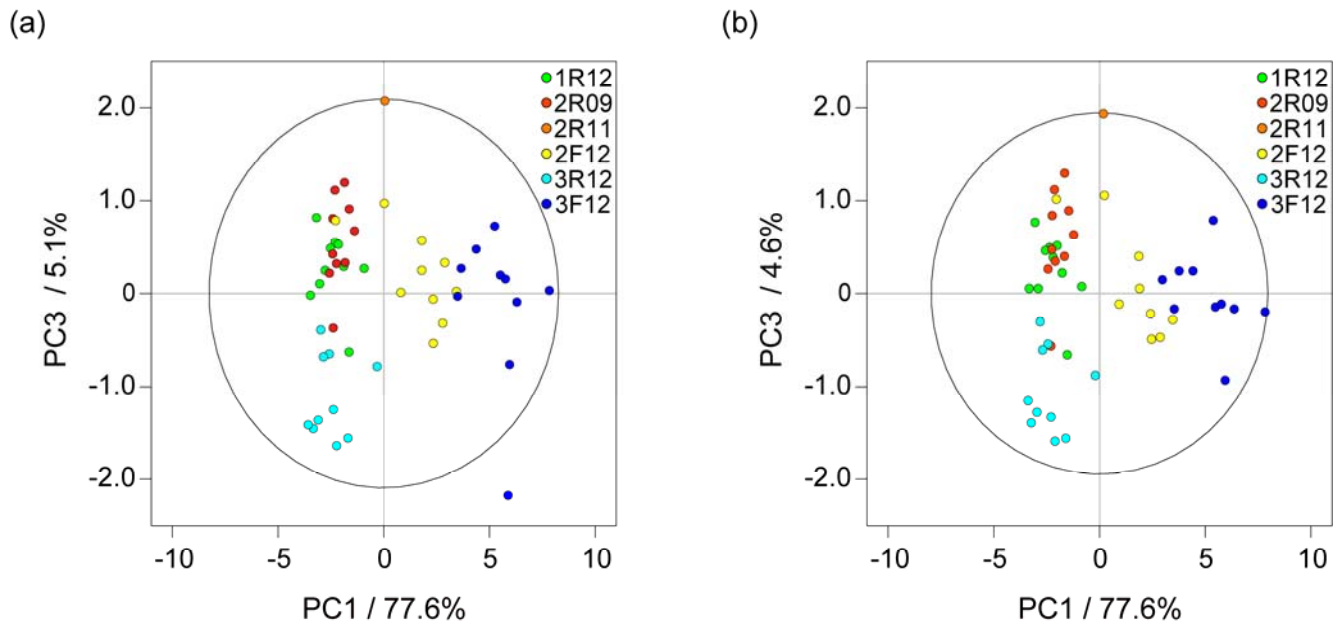

**Figure S3.**  $^{13}\text{C}$  and  $^{15}\text{N}$  enrichments of tissues of *Jatropha curcas* as measured by IR-MS.  $^{13}\text{C}$  and  $^{15}\text{N}$  enrichments were means of three measurements  $\pm$  S.D.

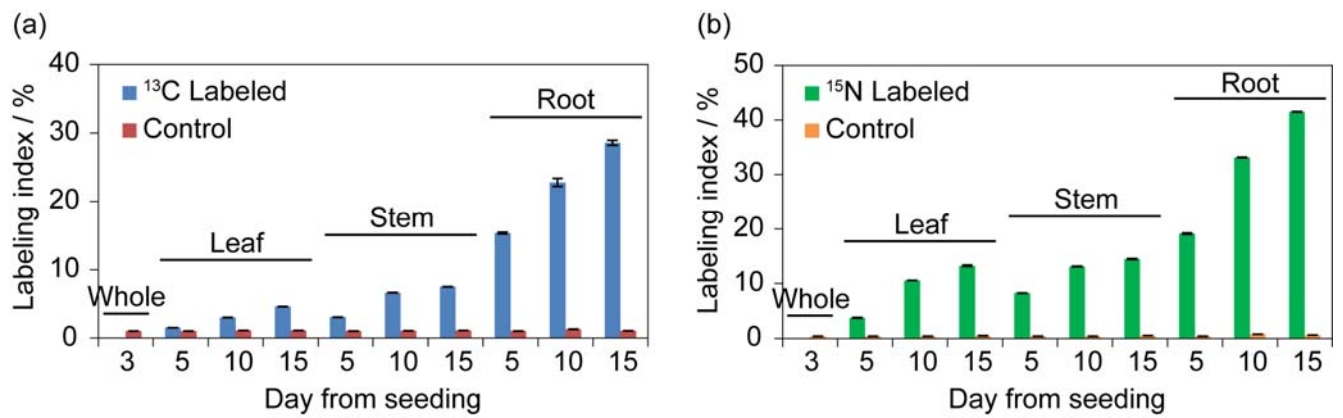

**Figure S4.** Possible splitting patterns in  $^1\text{H}$  and  $^{13}\text{C}$  NMR spectra in various  $^{13}\text{C}/^{12}\text{C}$  bondomers. This figure was constructed according to Massou *et al.* [1].

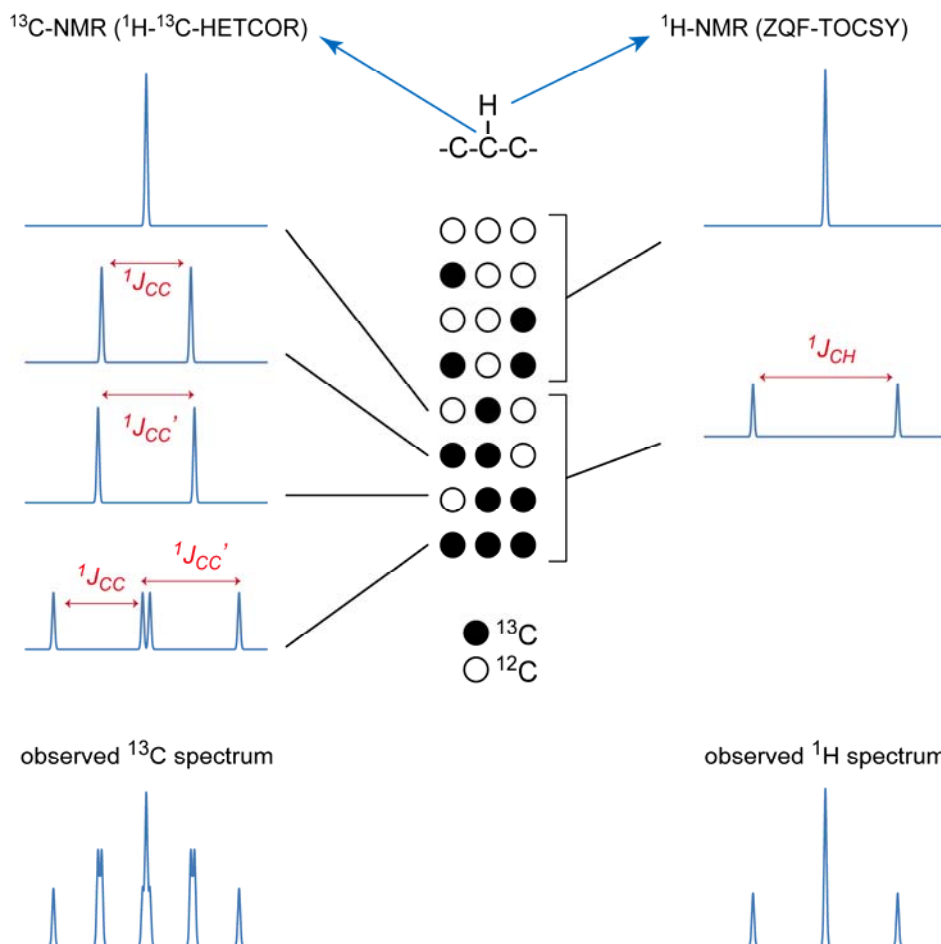

**Figure S5.**  $^1\text{H}$ - $^{13}\text{C}$  HSQC spectra of water-soluble metabolites in different tissues of *Jatropha curcas* seedlings (2R09). (a) Overview; (b) Aliphatic region ( $\delta_{1\text{H}}$ : 0.5–4.5 ppm,  $\delta_{^{13}\text{C}}$ : 10–60 ppm); (c) Primary alcoholic region ( $\delta_{1\text{H}}$ : 3.0–4.5 ppm,  $\delta_{^{13}\text{C}}$ : 60–90 ppm); (d) Anomeric sugar region ( $\delta_{1\text{H}}$ : 4.25–5.5 ppm,  $\delta_{^{13}\text{C}}$ : 90–115 ppm). MI: myo-inositol; MD: maltodextrin; Suc: sucrose; Glc: glucose; Fru: fructose; EA: ethanolamine.

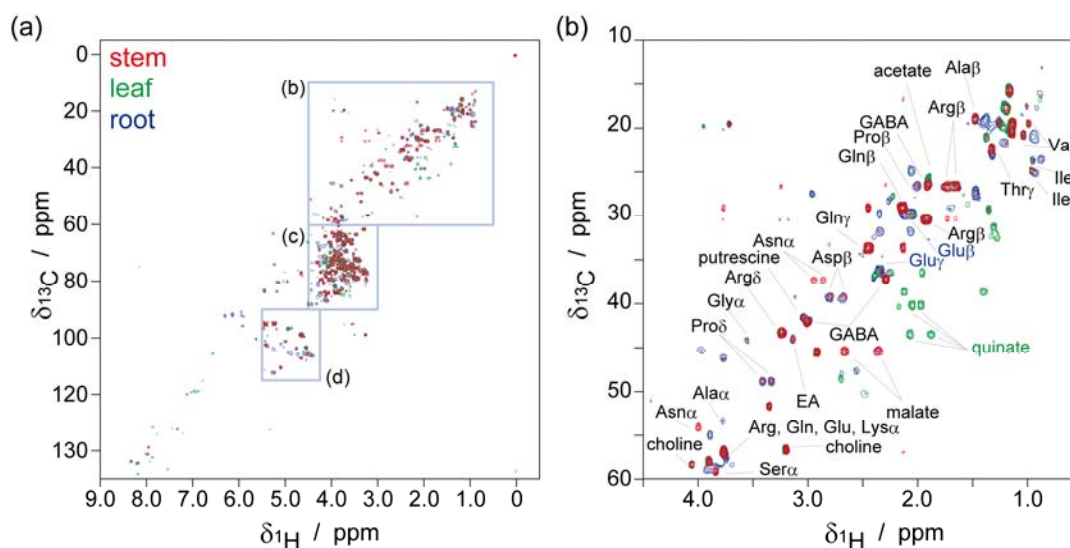

Figure S5. Cont.

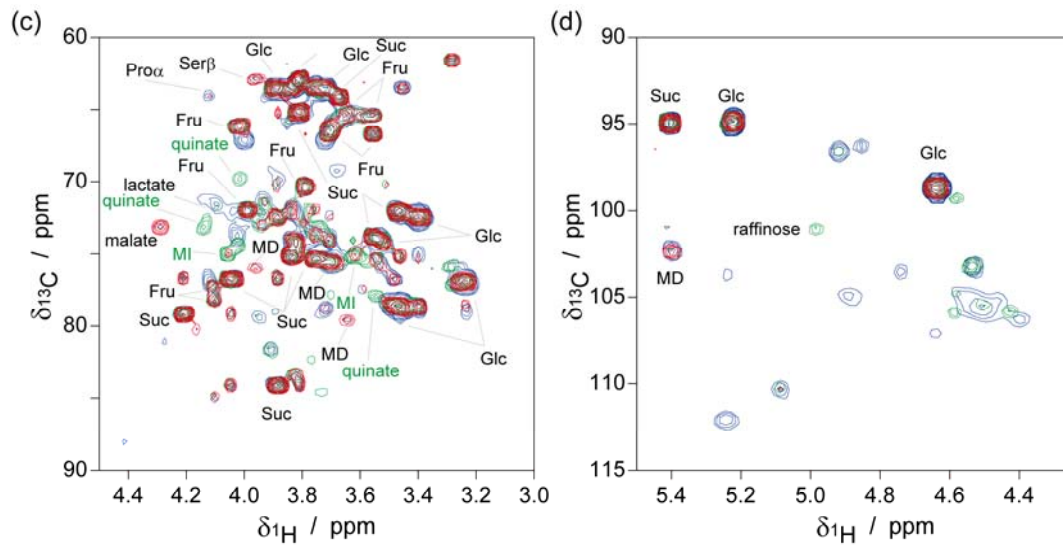

## Reference

1. Massou, S.; Nicolas, C.; Letisse, F.; Portais, J.C. NMR-based fluxomics: Quantitative 2D NMR methods for isotopomers analysis. *Phytochemistry* **2007**, *68*, 2330–2340.

© 2014 by the authors; licensee MDPI, Basel, Switzerland. This article is an open access article distributed under the terms and conditions of the Creative Commons Attribution license (<http://creativecommons.org/licenses/by/4.0/>).
